# Supplementary material
Source: HighWire-hosted journal article supplement (https://jitc.bmj.com/content/8/2/e000883)

## Supp Figure 3

**A****Breast Cohort  
Regimen A****Colorectal Cohort  
Regimen A**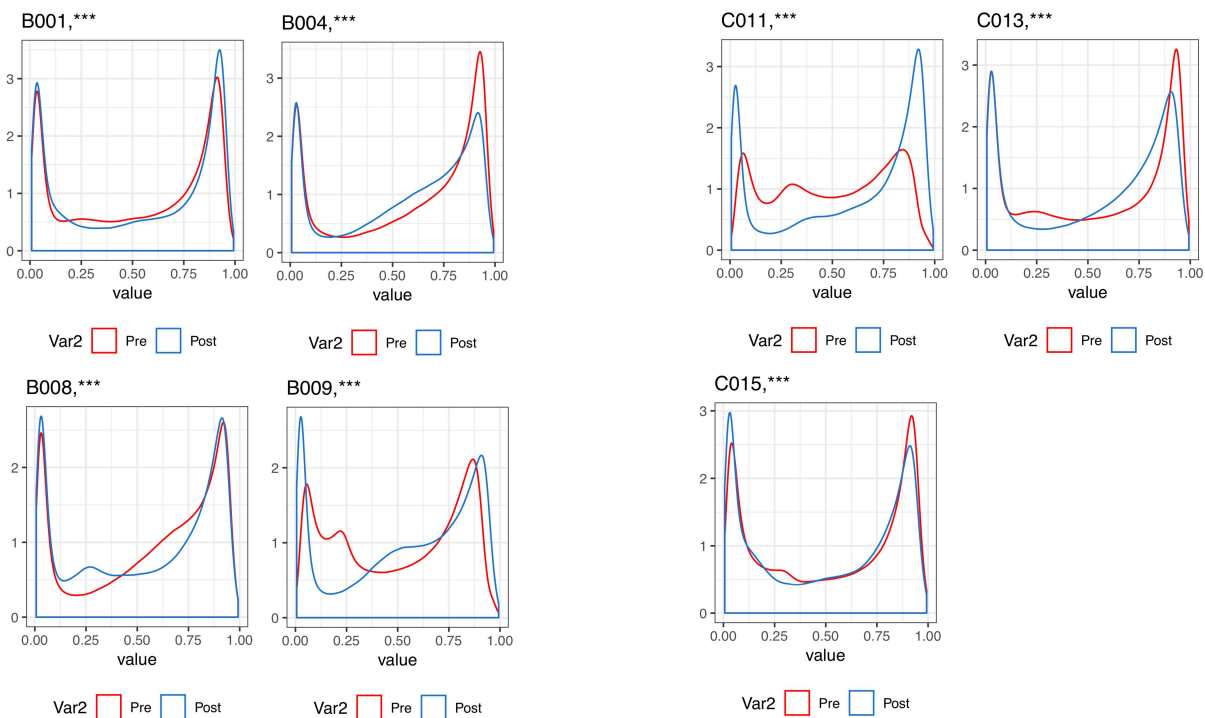**B****Colorectal Cohort  
Regimen B****Ovarian Cohort  
Regimen B**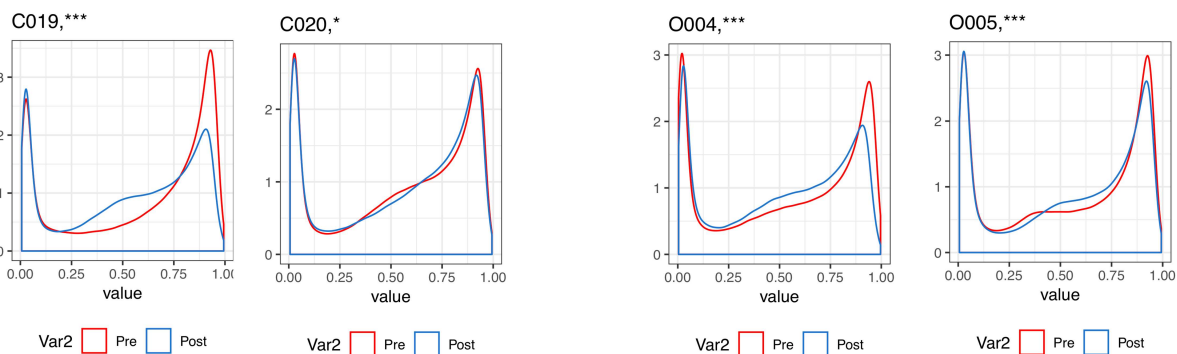

Supplement: inline-supplementary-material-5 [file inline-supplementary-material-5.pdf]
