# Supplementary material
Source: HighWire-hosted journal article supplement (https://jitc.bmj.com/content/8/2/e000883)

## Supp Figure 4

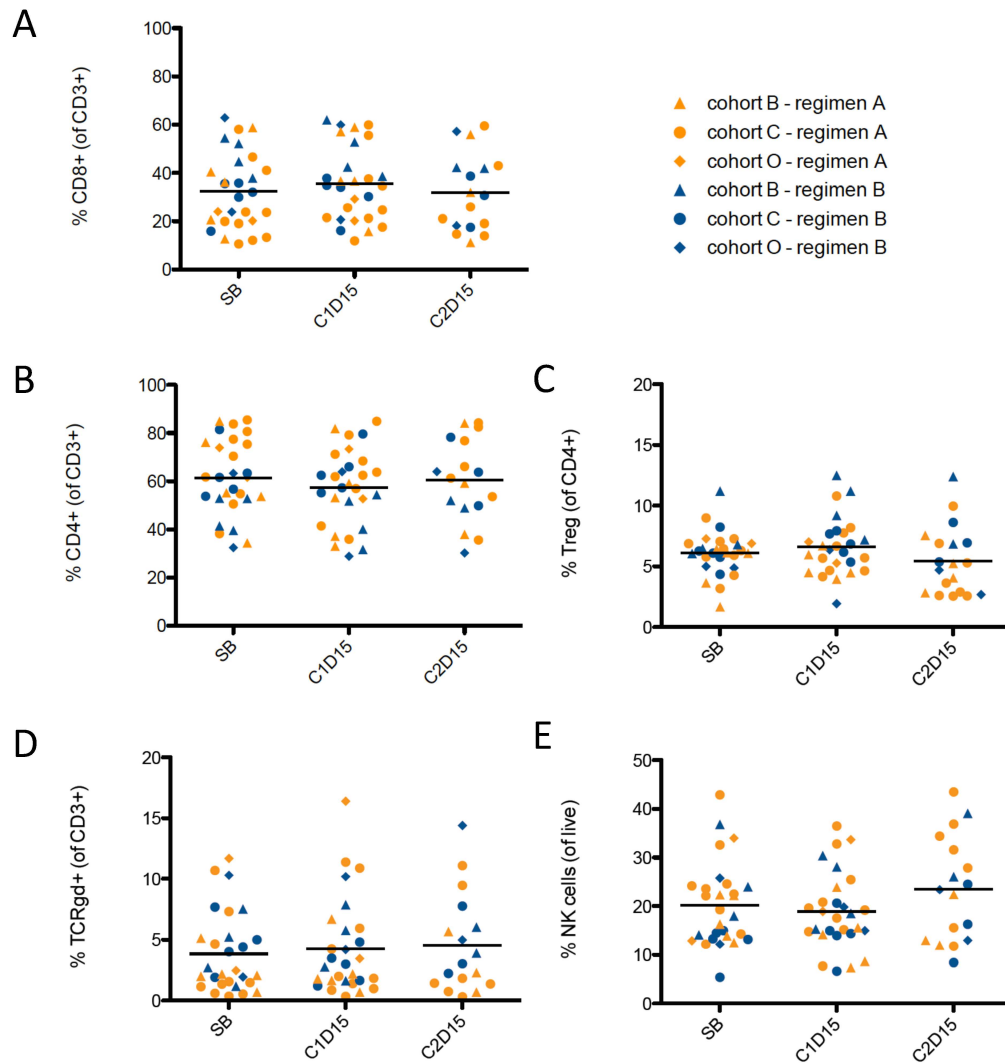

Supplement: inline-supplementary-material-6 [file inline-supplementary-material-6.pdf]
